# Supplementary material for: Design, Synthesis, and In Vitro Biological Activities of a Bio-Oxidizable Prodrug to Deliver Both ChEs and DYRK1A Inhibitors for AD Therapy
Source: PubMed Central journal article supplement (PMC6479981; doi:10.3390/molecules24071264), 2019-04-01

# SUPPORTING MATERIAL

## Design, Synthesis and In Vitro Biological Activities of a Bio-oxidizable Prodrug to Deliver both ChEs and DYRK1A Inhibitors for AD Therapy

Anais Barré <sup>1,2</sup>, Rabah Azzouz<sup>1</sup>, Vincent Gembus <sup>1,\*</sup>, Cyril Papamicaël <sup>2</sup> and Vincent Levacher <sup>2,\*</sup>

<sup>1</sup> VFP Therapies R&D; 1 rue Tesnière, 76130 Mont Saint-Aignan, France

<sup>2</sup> Normandie Univ, UNIROUEN, INSA Rouen, CNRS, COBRA, 76000 Rouen, France

\* Correspondence: vincent.levacher@insa-rouen (V.L); vgembus@vfp-therapies.com (V.G.)

### Content:

- NMR spectra (<sup>1</sup>H/DEPT 135/<sup>13</sup>C) of compounds **6**, **7**, **8**, **9**, **12**, **13**, **14**, **4**, **15** and **16**

- $^1\text{H}$  NMR spectrum in  $\text{CDCl}_3$  of compound (6)

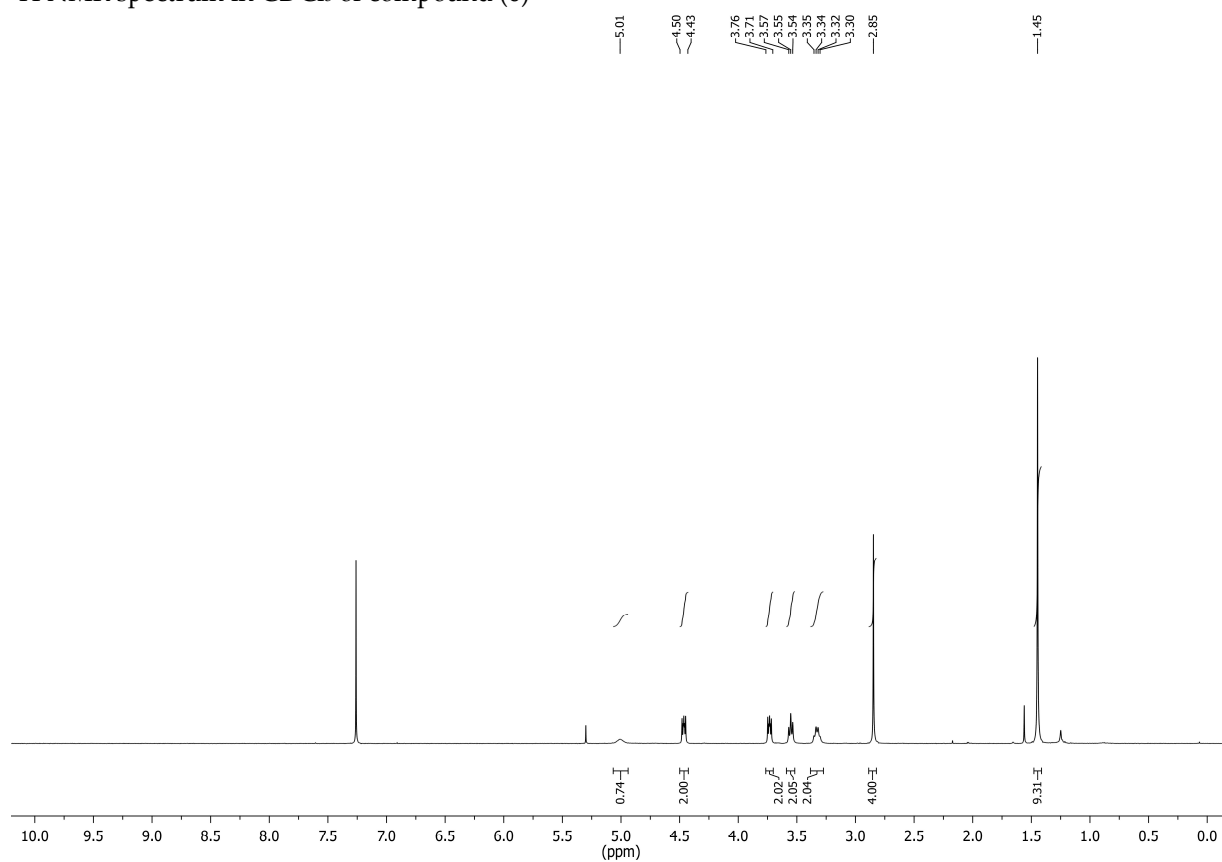

- DEPT-135 NMR spectrum in  $\text{CDCl}_3$  of compound (6)

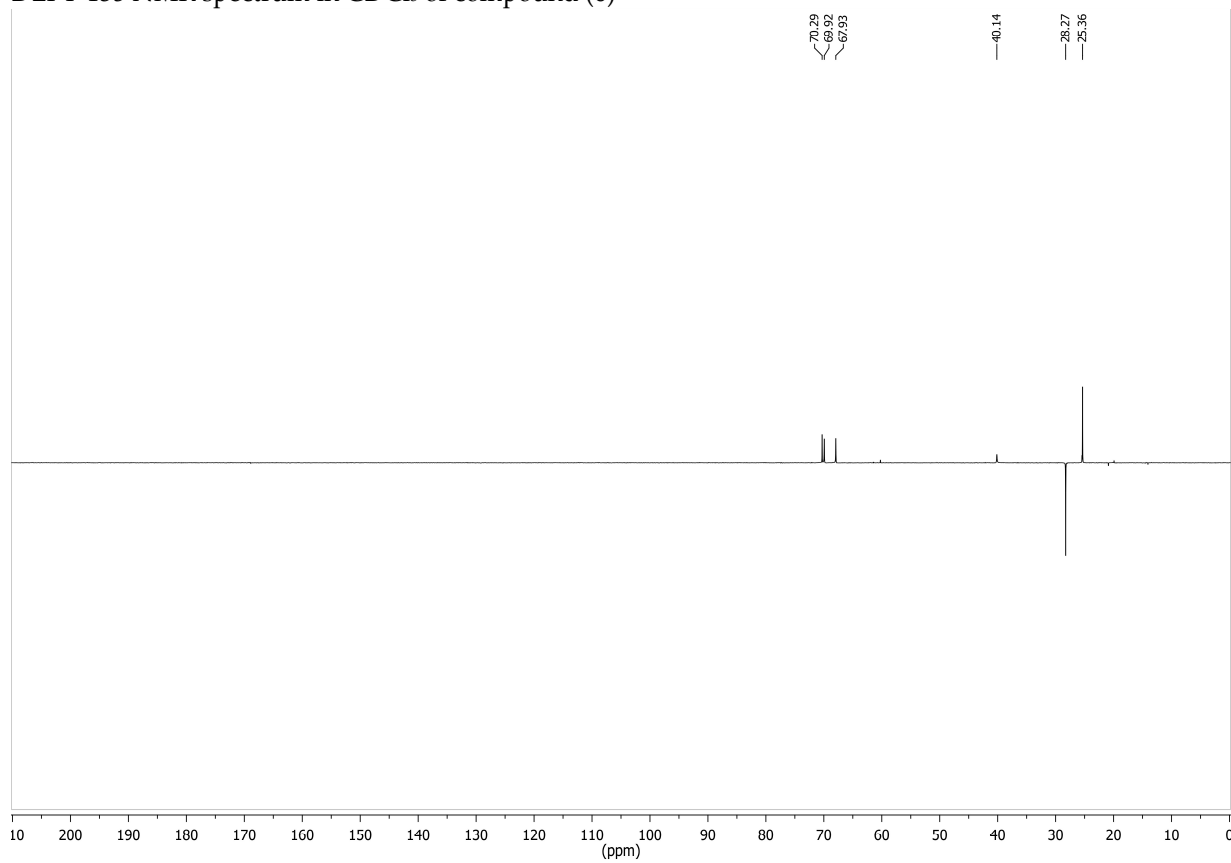

- $^{13}\text{C}$  NMR spectrum in  $\text{CDCl}_3$  of compound (6)

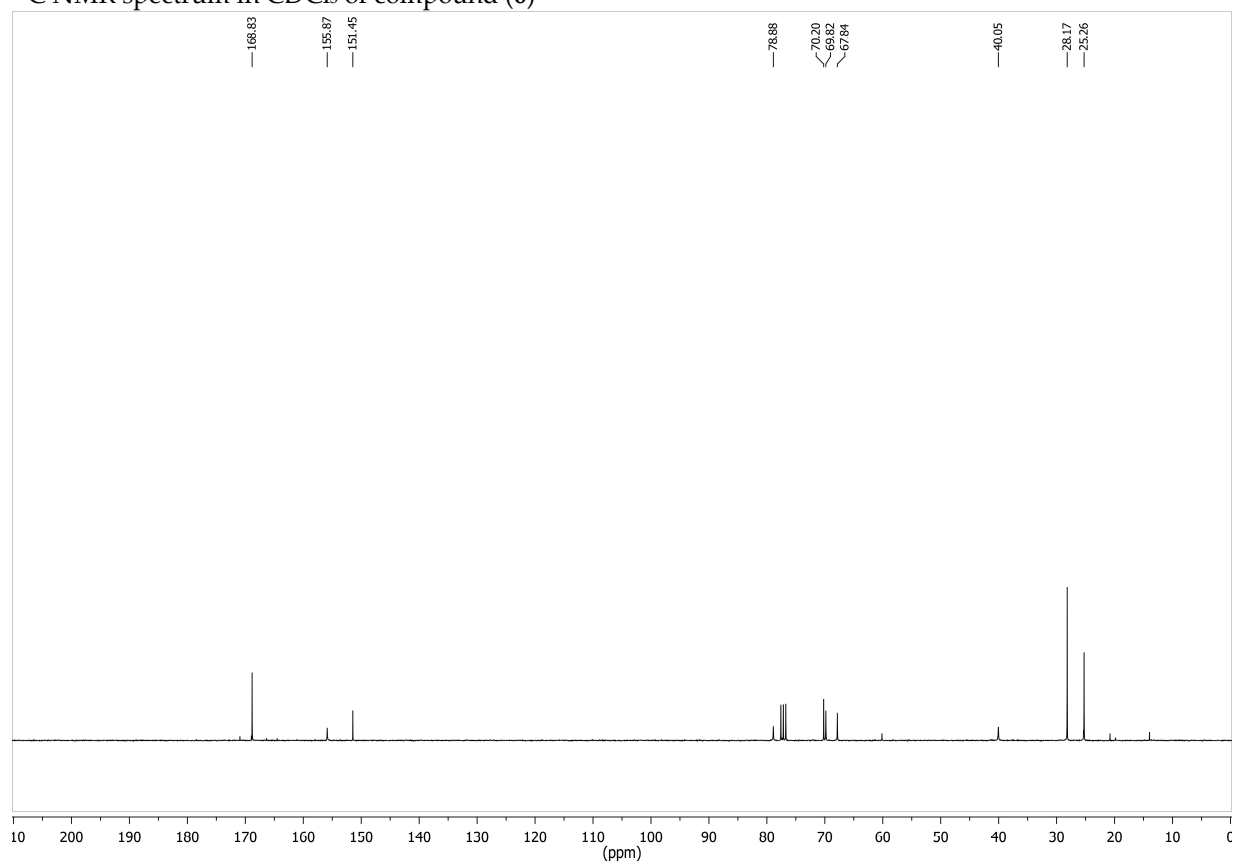

- $^1\text{H}$  NMR spectrum in  $\text{CDCl}_3$  of compound (7)

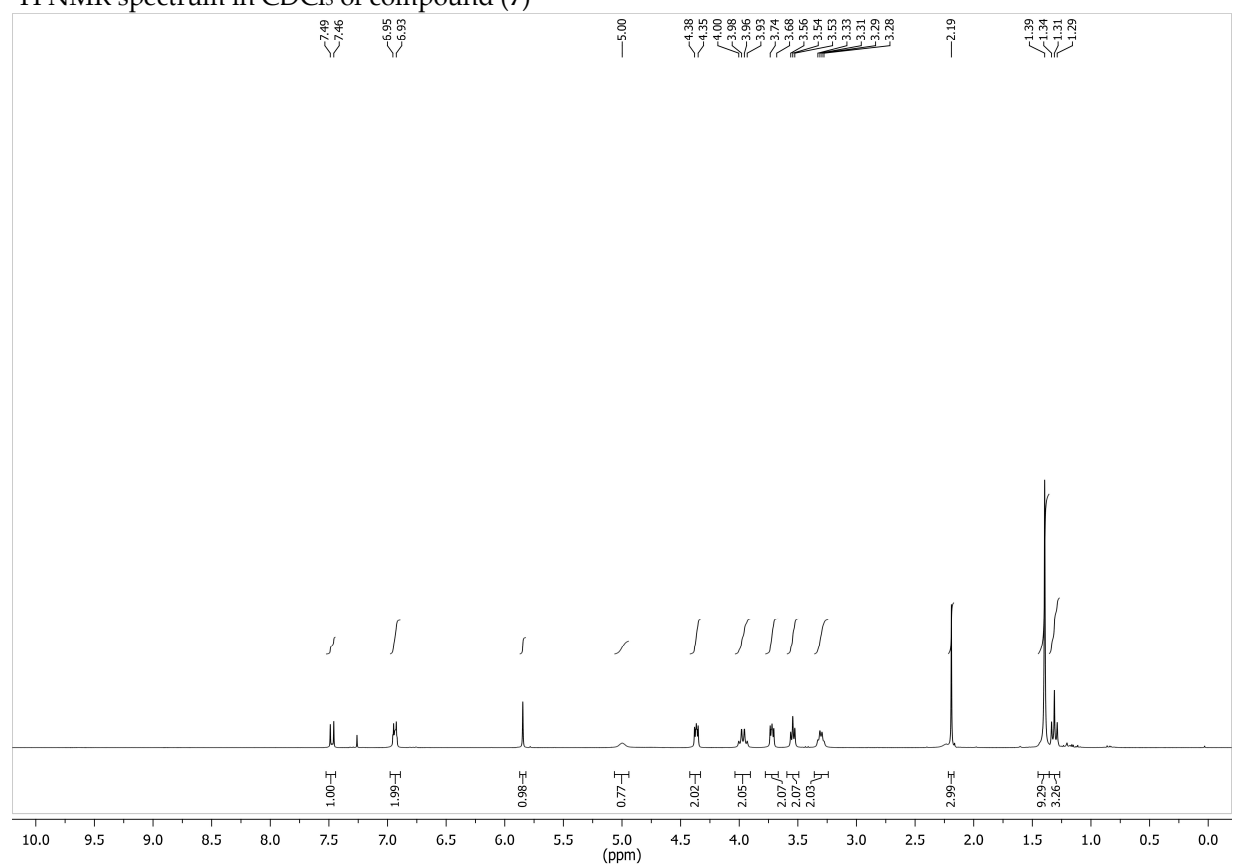

- DEPT-135 NMR spectrum in CDCl<sub>3</sub> of compound (7)

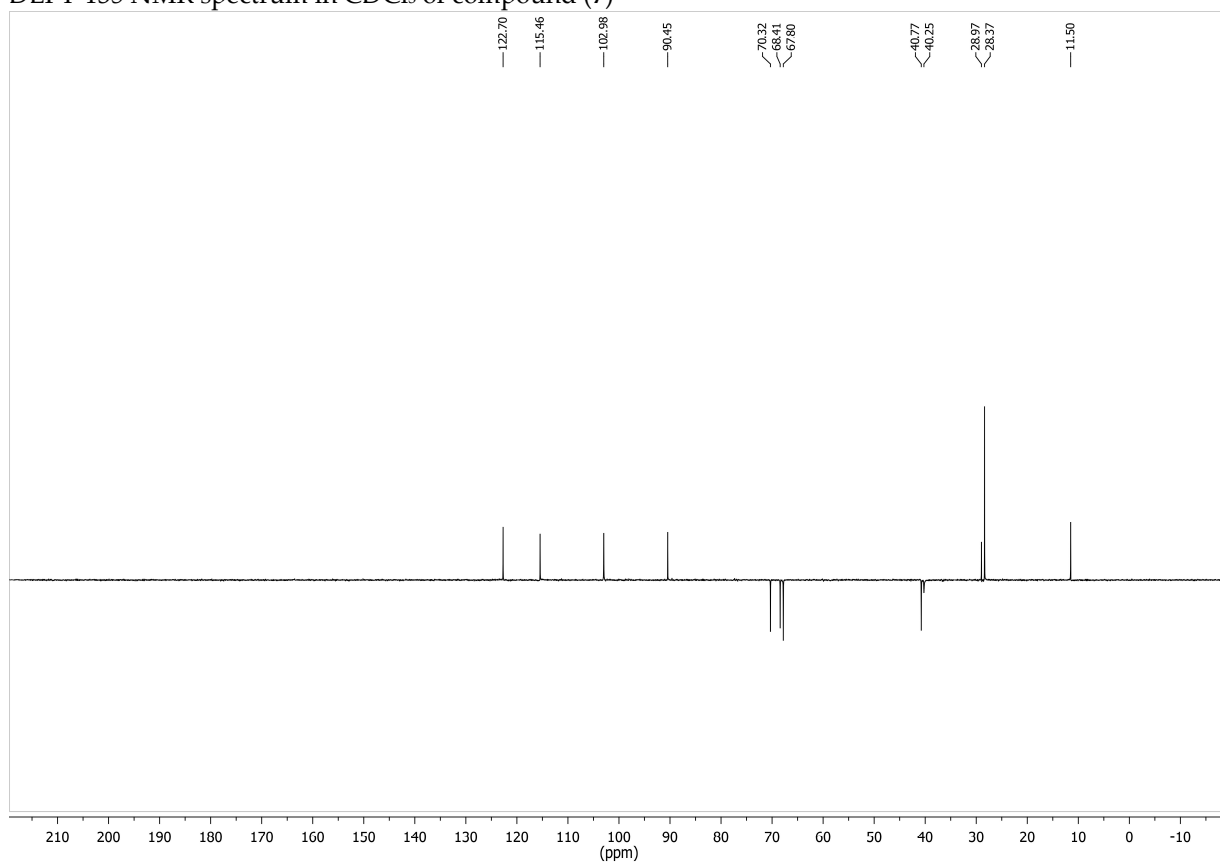

- <sup>13</sup>C NMR NMR spectrum in CDCl<sub>3</sub> of compound (7)

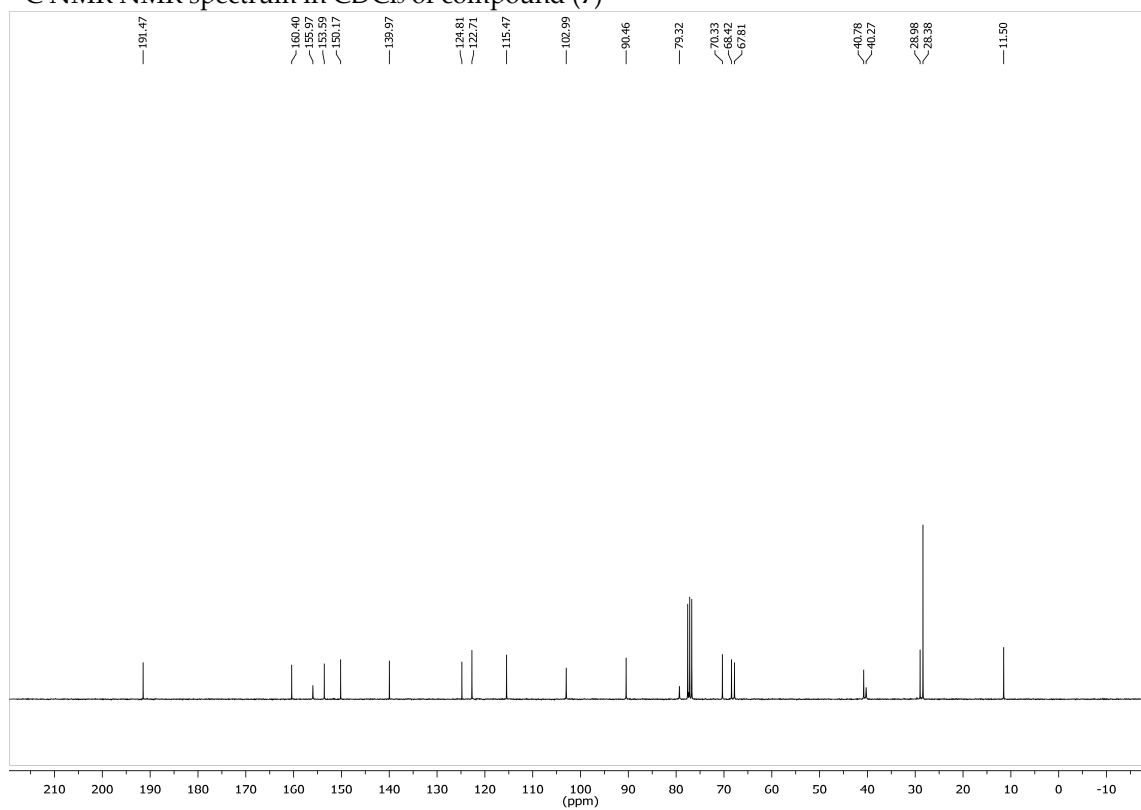

- $^1\text{H}$  NMR spectrum in  $\text{DMSO-d}_6$  of compound (8)

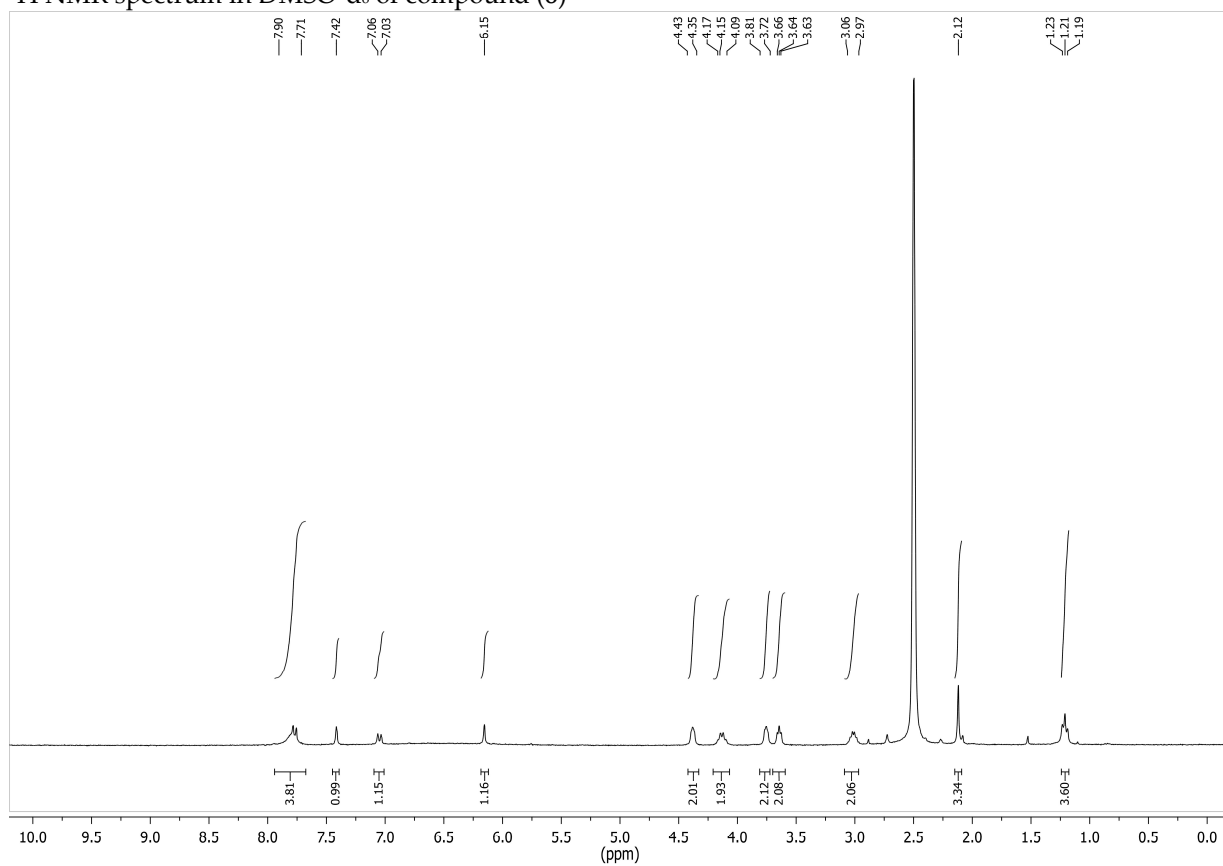

- DEPT-135 NMR spectrum in  $\text{DMSO-d}_6$  of compound (8)

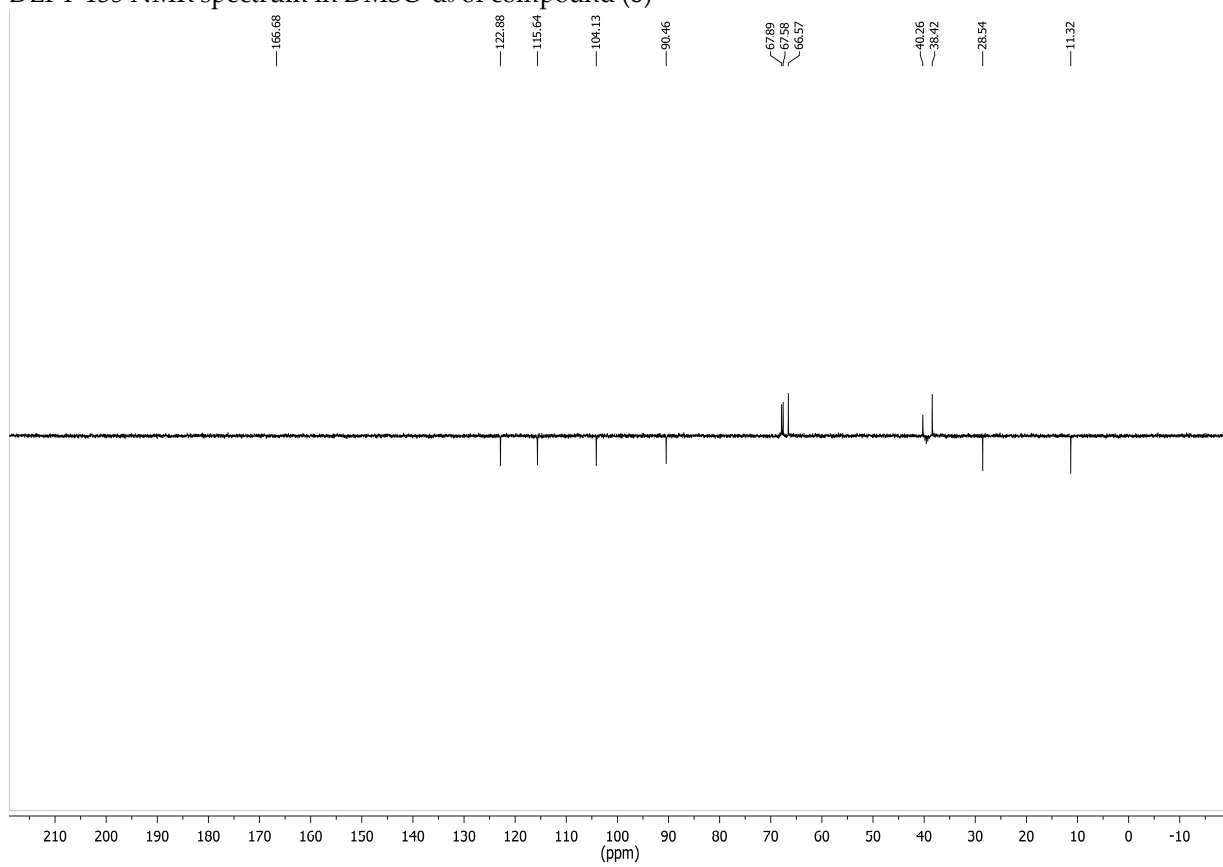

- $^{13}\text{C}$  NMR spectrum in  $\text{DMSO-d}_6$  of compound (8)

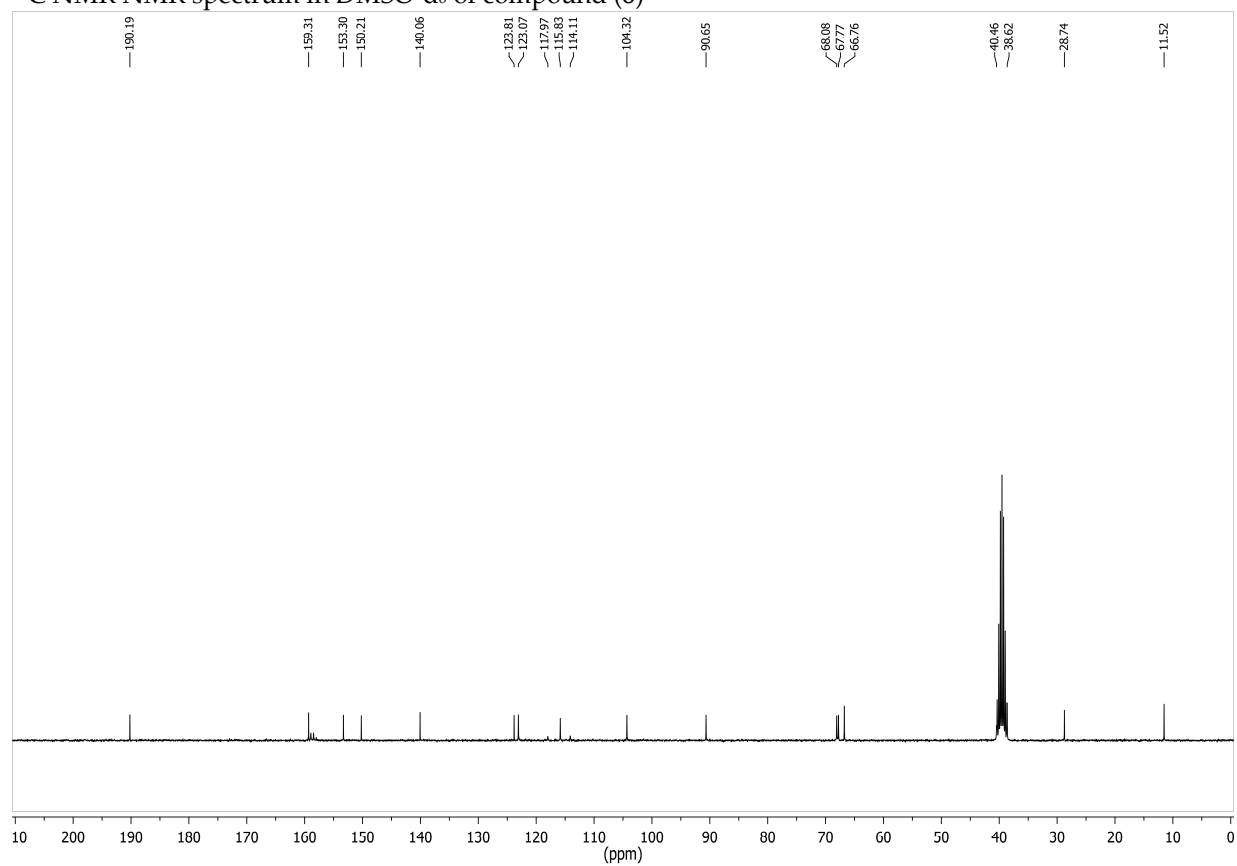

- $^1\text{H}$  NMR spectrum in  $\text{CDCl}_3$  of compound (12)

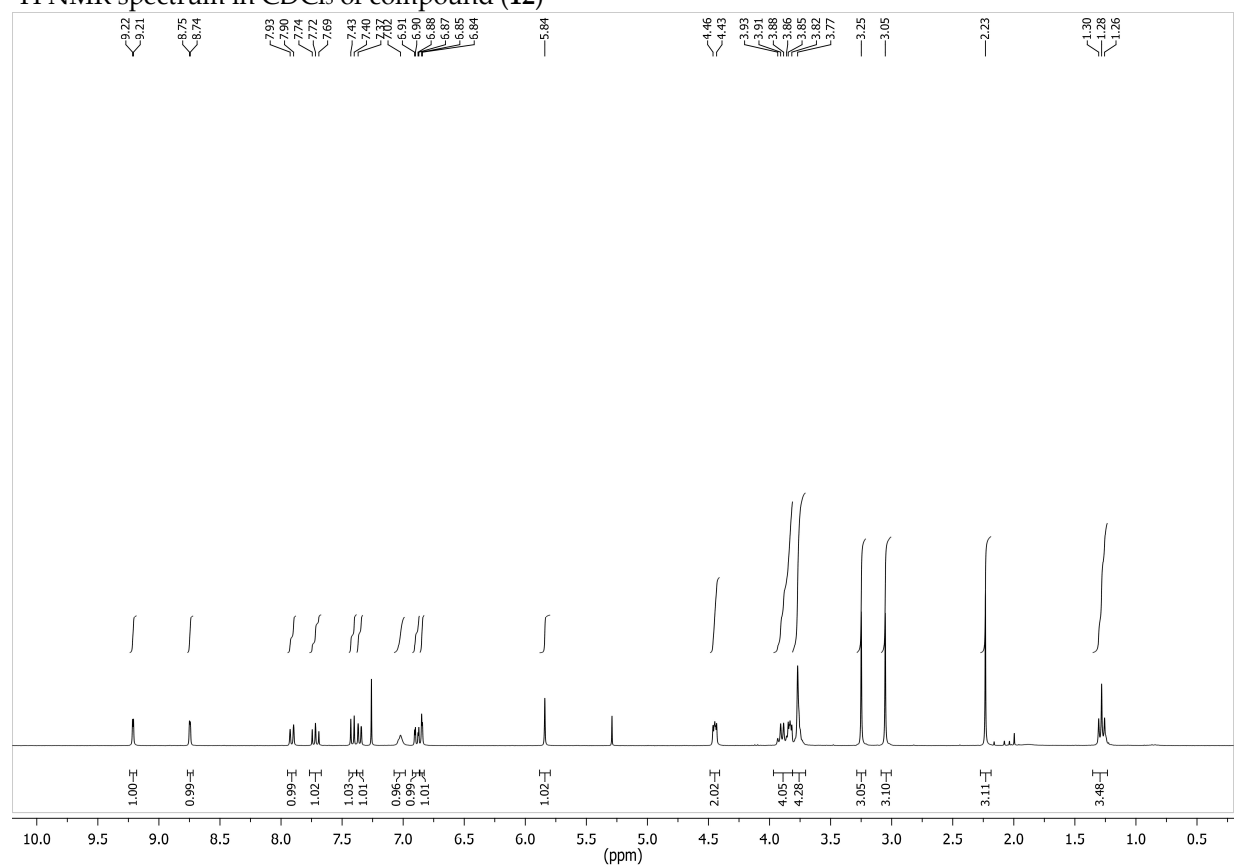

- DEPT-135 NMR spectrum in CDCl<sub>3</sub> of compound (**12**)

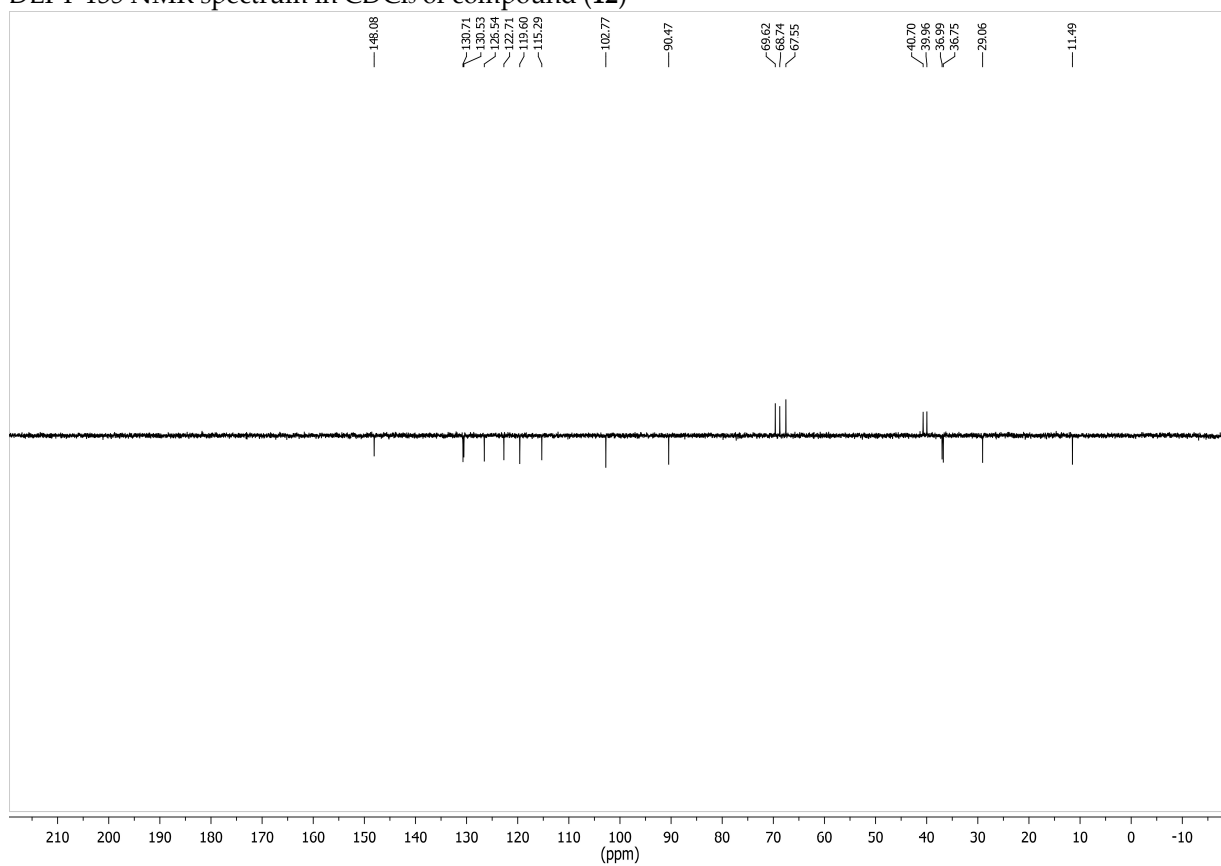

- <sup>13</sup>C NMR NMR spectrum in CDCl<sub>3</sub> of compound (**12**)

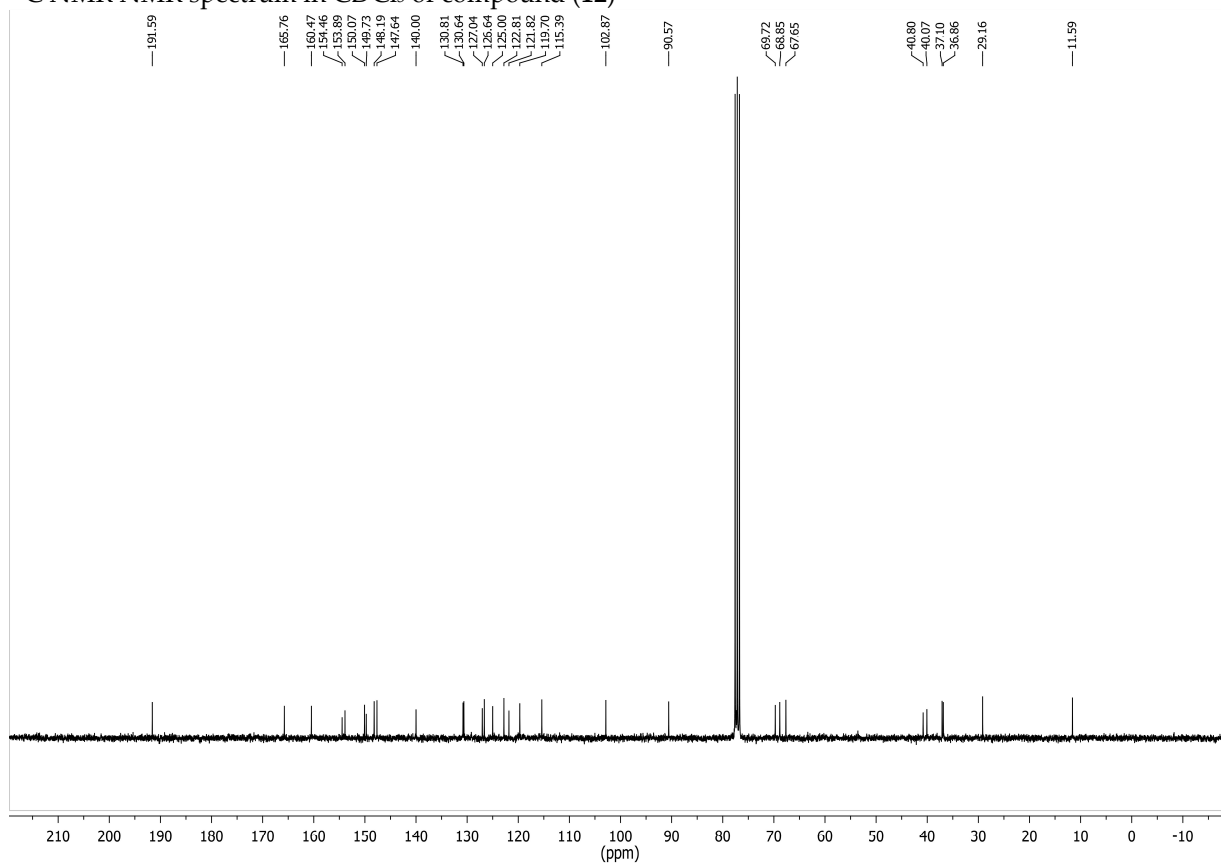

- $^1\text{H}$  NMR spectrum in  $\text{CDCl}_3$  of compound (**13**)

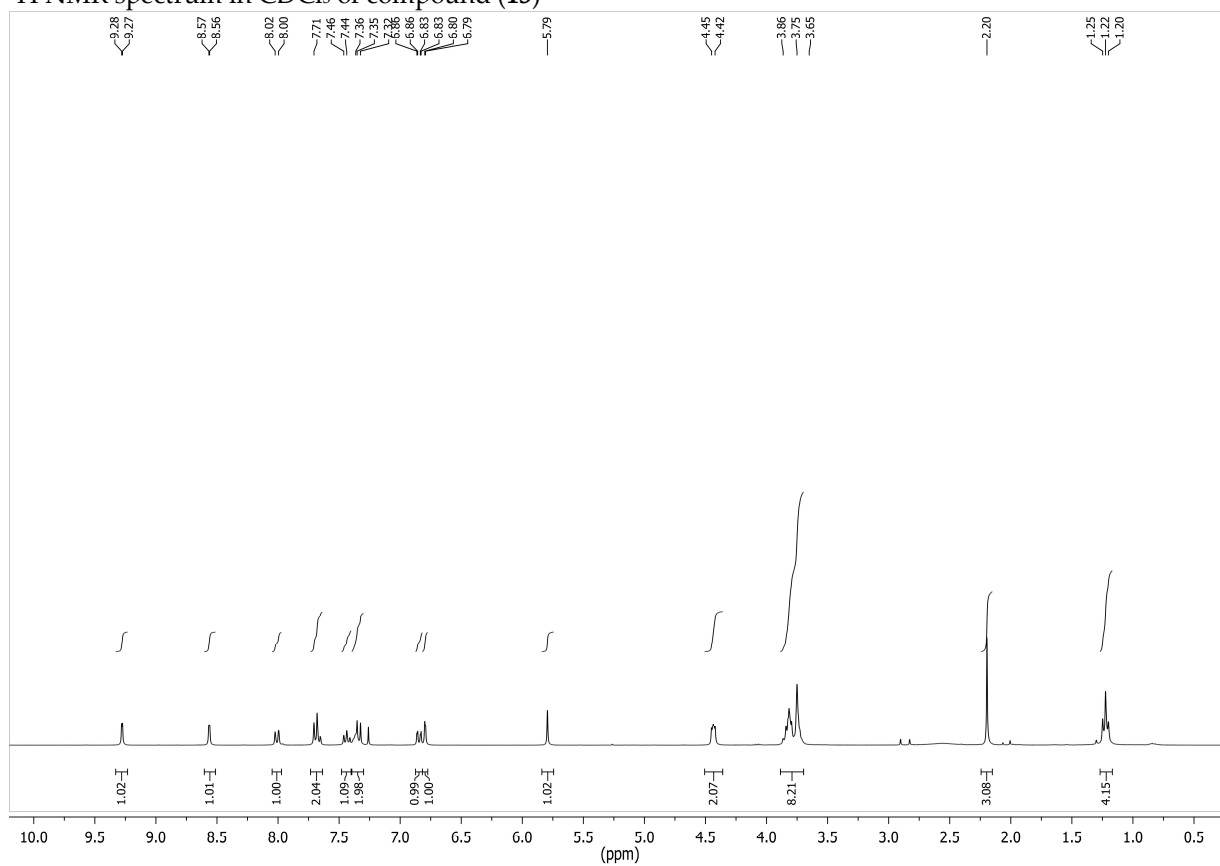

- DEPT-135 NMR spectrum in  $\text{CDCl}_3$  of compound (**13**)

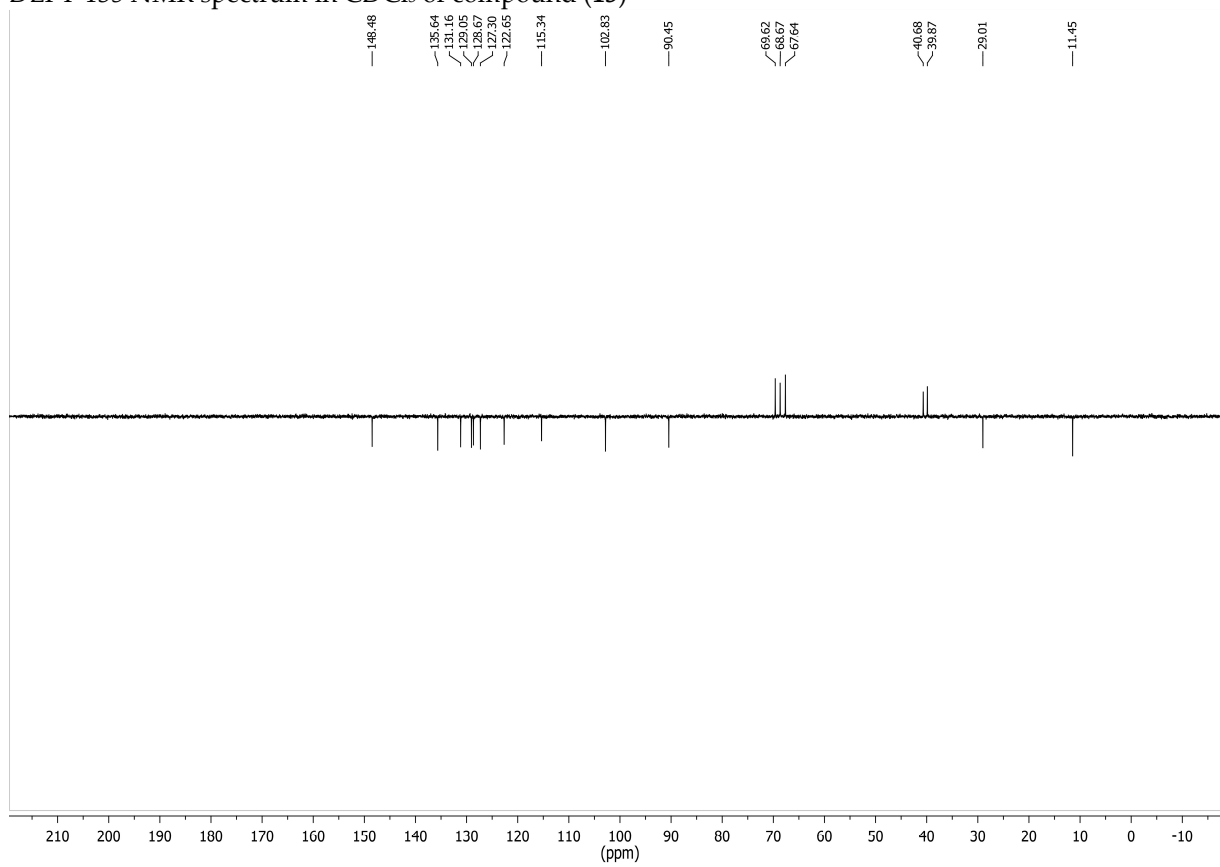



- $^{13}\text{C}$  NMR NMR spectrum in  $\text{CDCl}_3$  of compound (13)

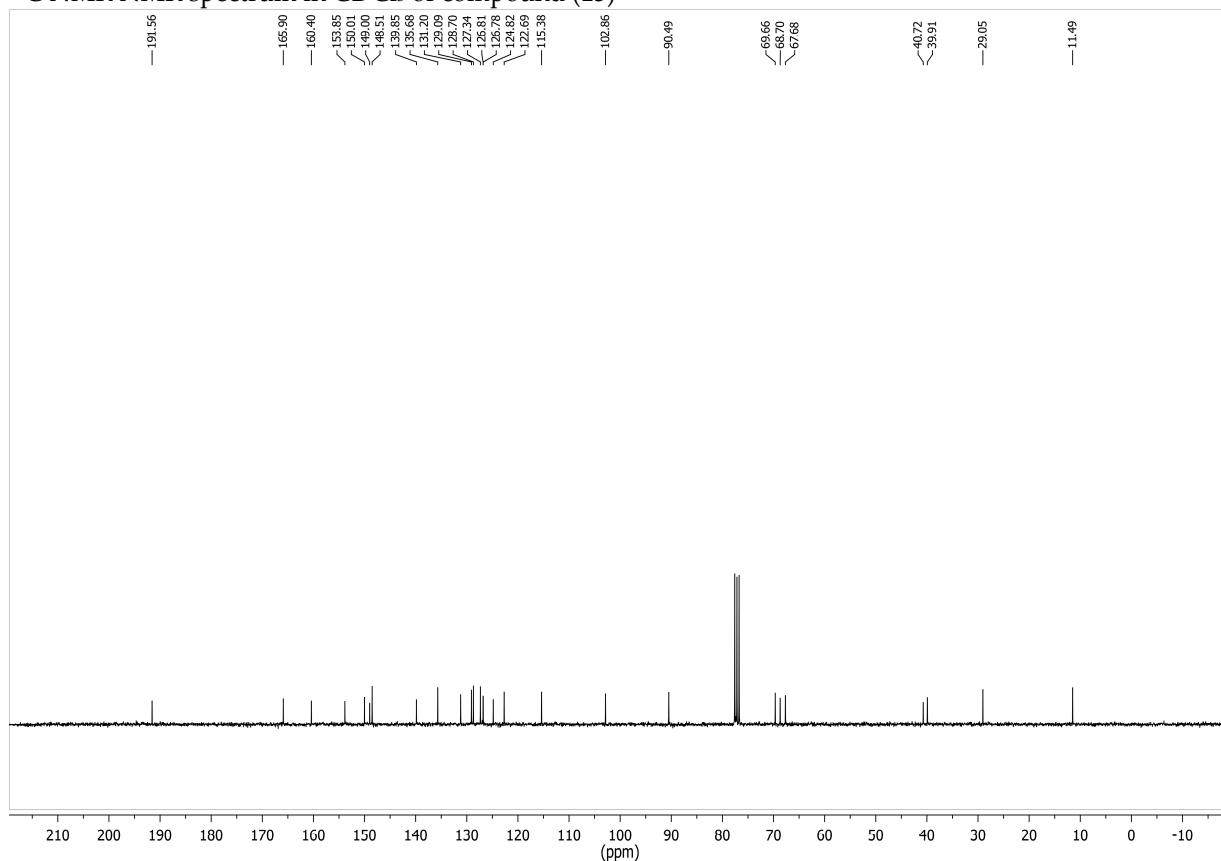

- $^1\text{H}$  NMR spectrum in  $\text{DMSO}-d_6$  of compound (14)

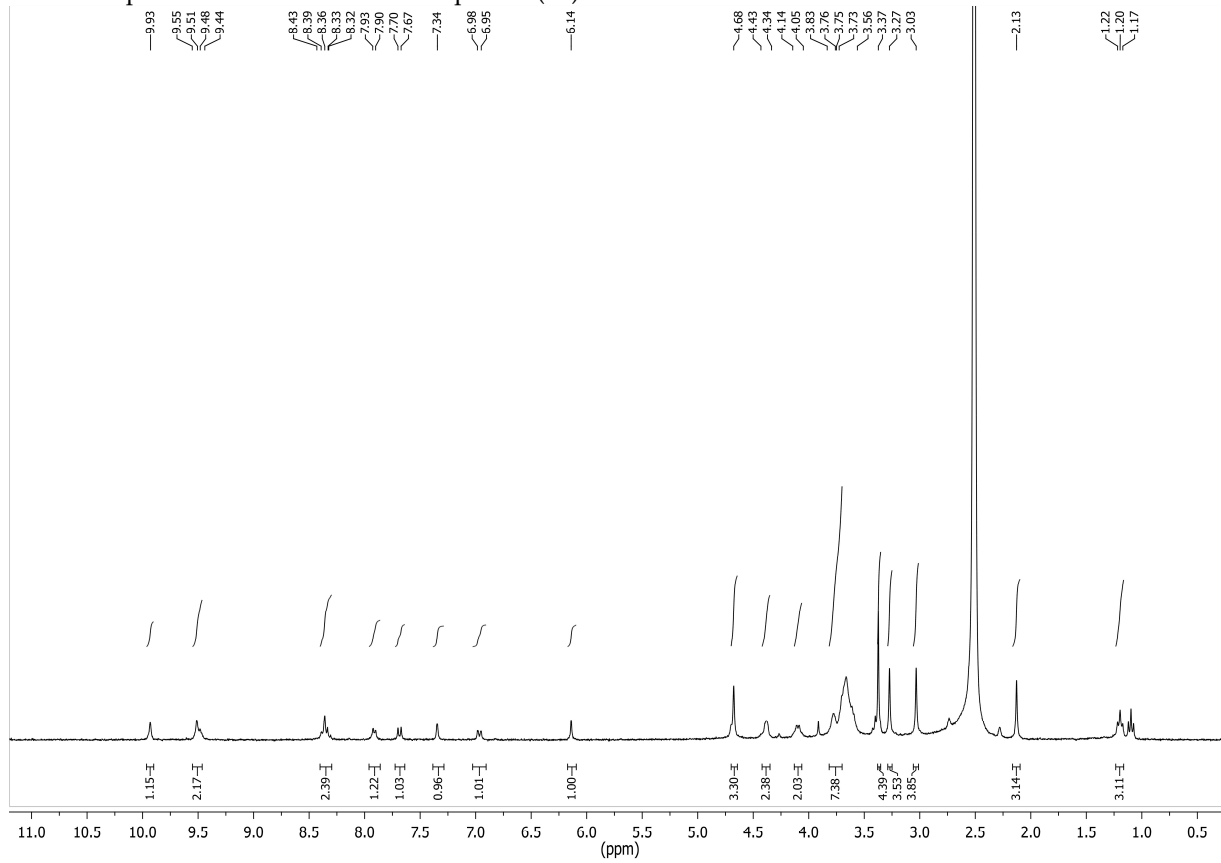

- DEPT-135 NMR spectrum in DMSO-d<sub>6</sub> of compound (14)

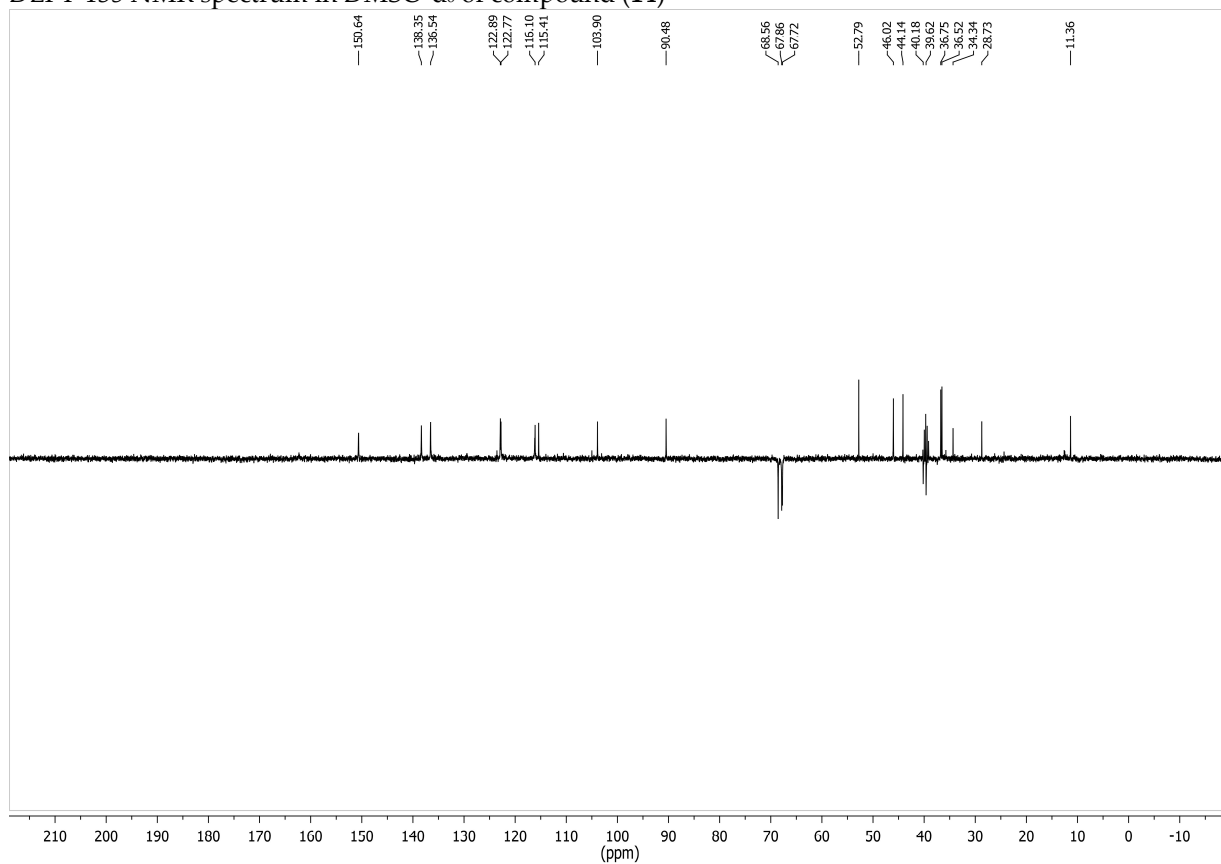

- <sup>13</sup>C NMR NMR spectrum in DMSO-d<sub>6</sub> of compound (14)

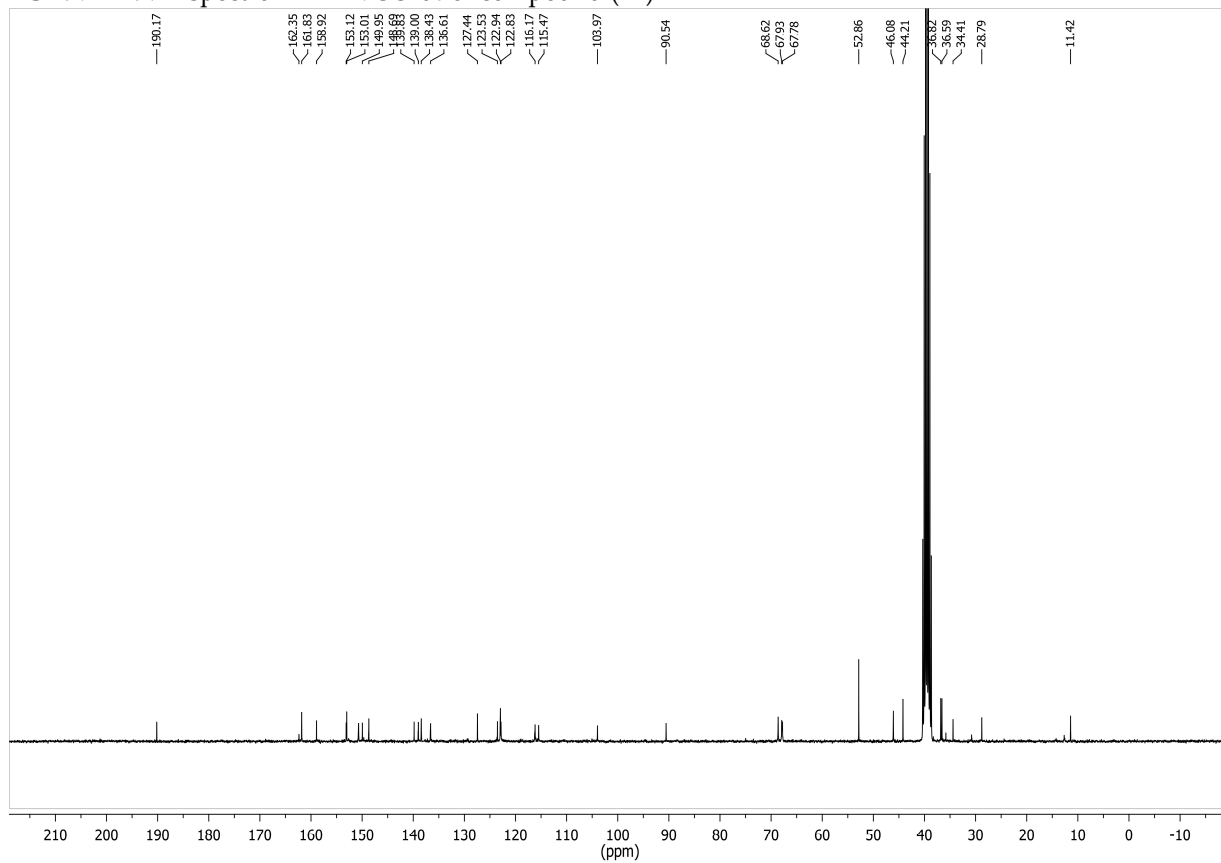

- <sup>1</sup>H NMR spectrum in DMSO-d<sub>6</sub> of compound (4)

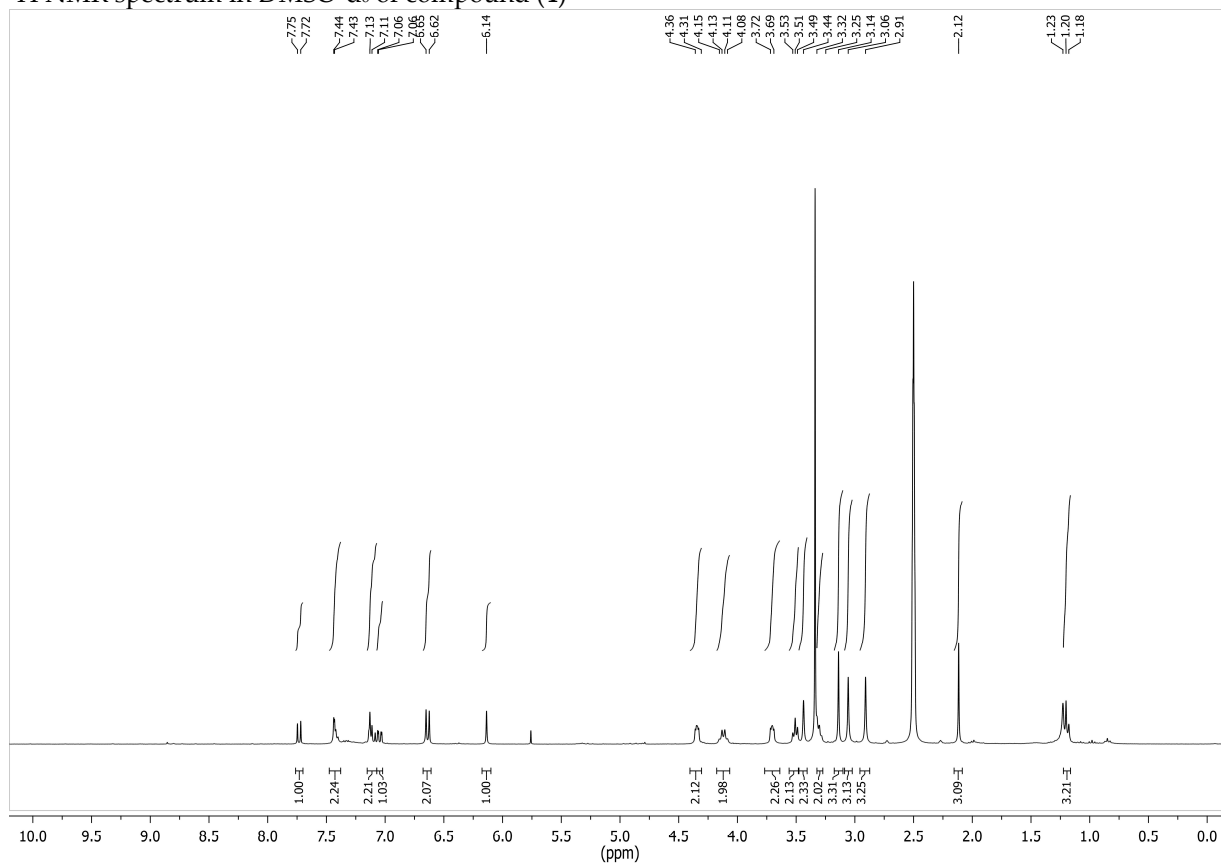

- DEPT-135 NMR spectrum in DMSO-d<sub>6</sub> of compound (4)

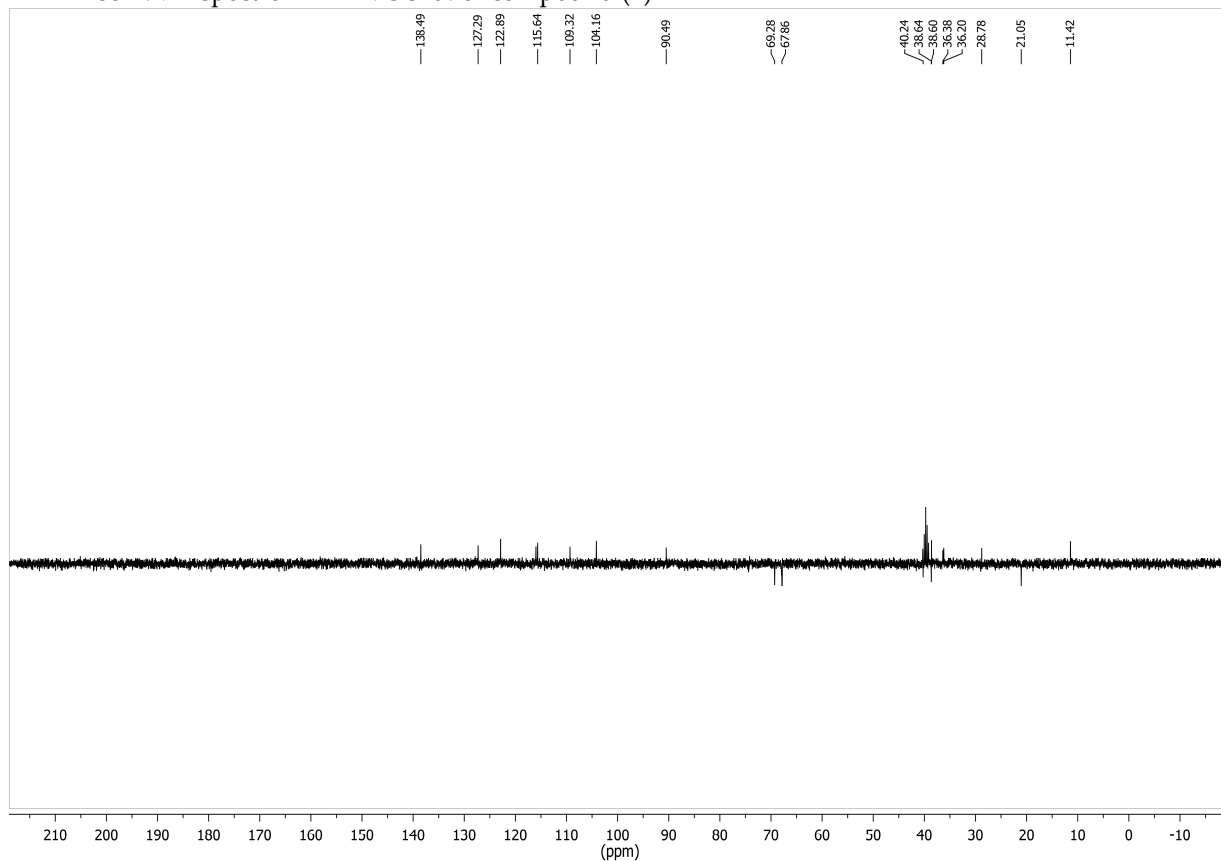

- $^{13}\text{C}$  NMR spectrum in  $\text{DMSO-d}_6$  of compound (4)

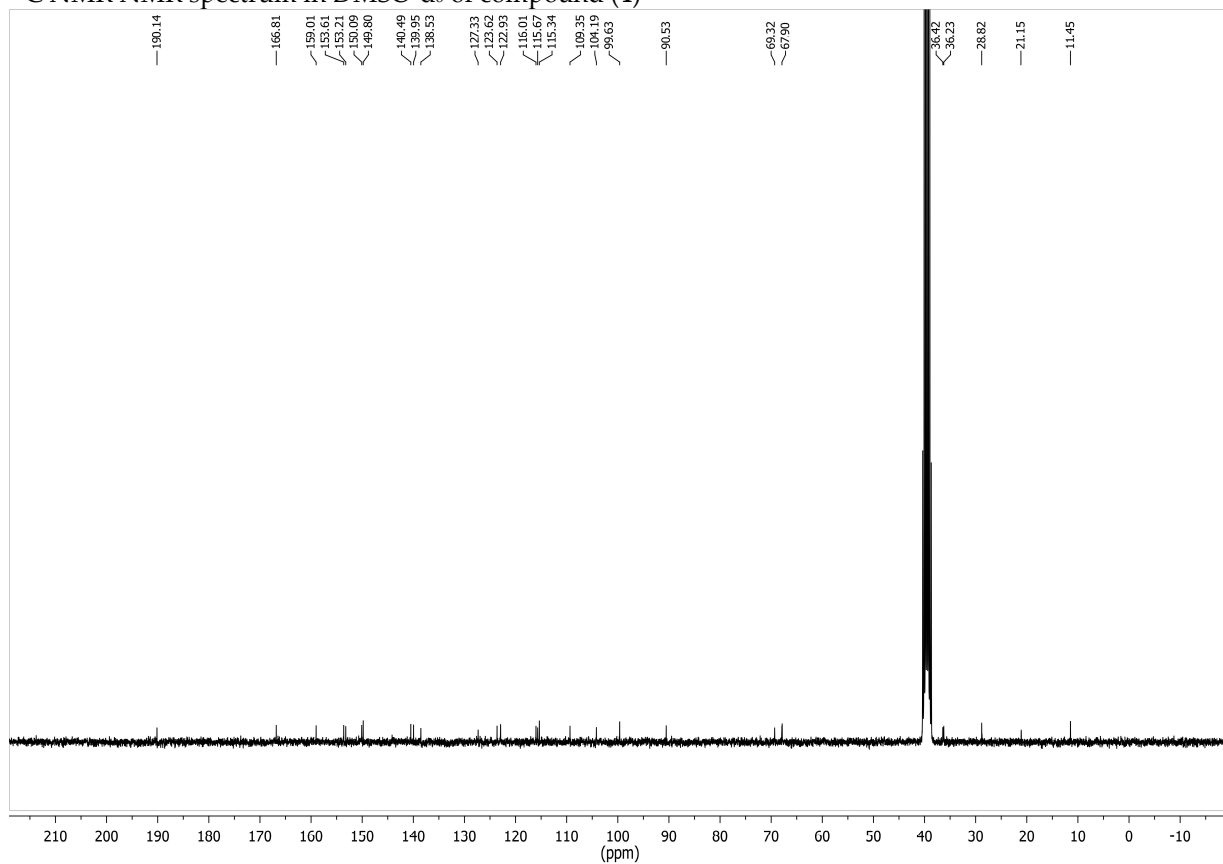

- $^1\text{H}$  NMR spectrum in  $\text{DMSO-d}_6$  of compound (15)

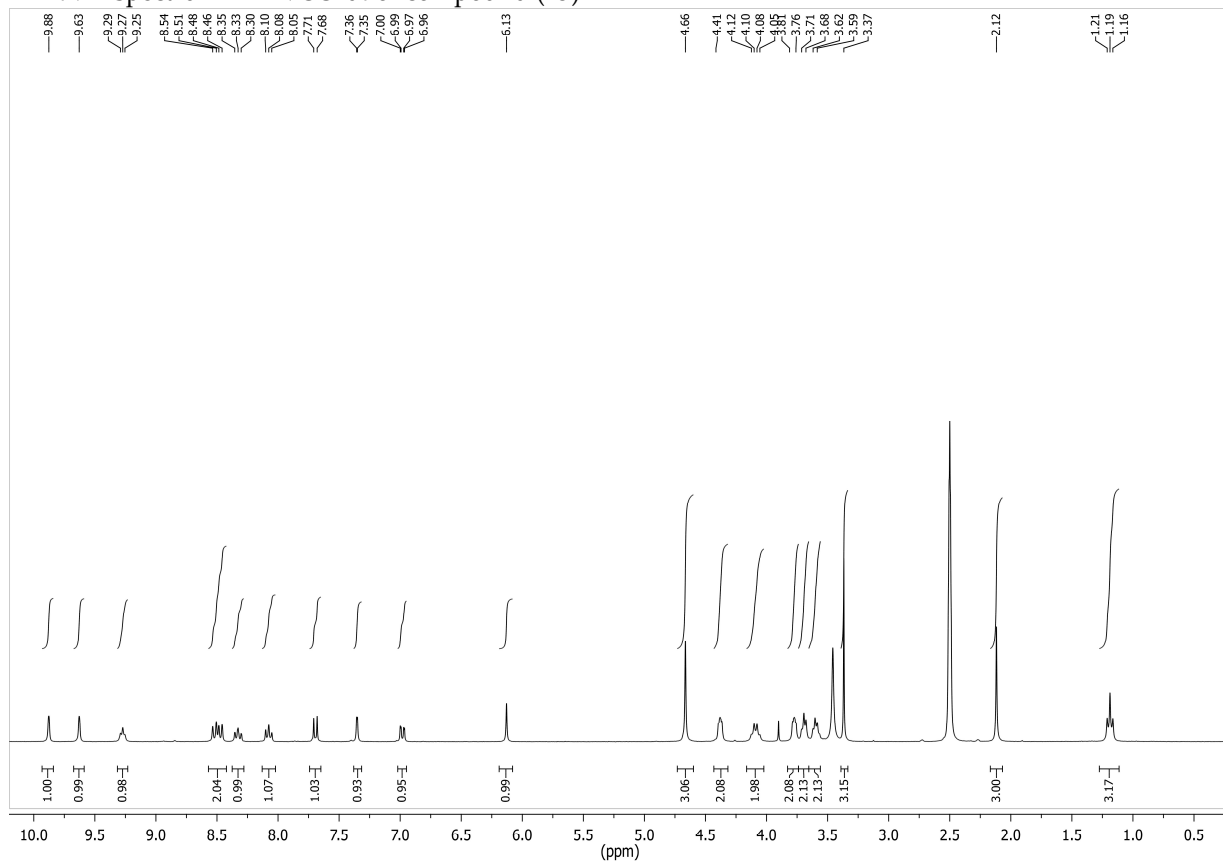

- DEPT-135 NMR spectrum in DMSO-d<sub>6</sub> of compound (15)

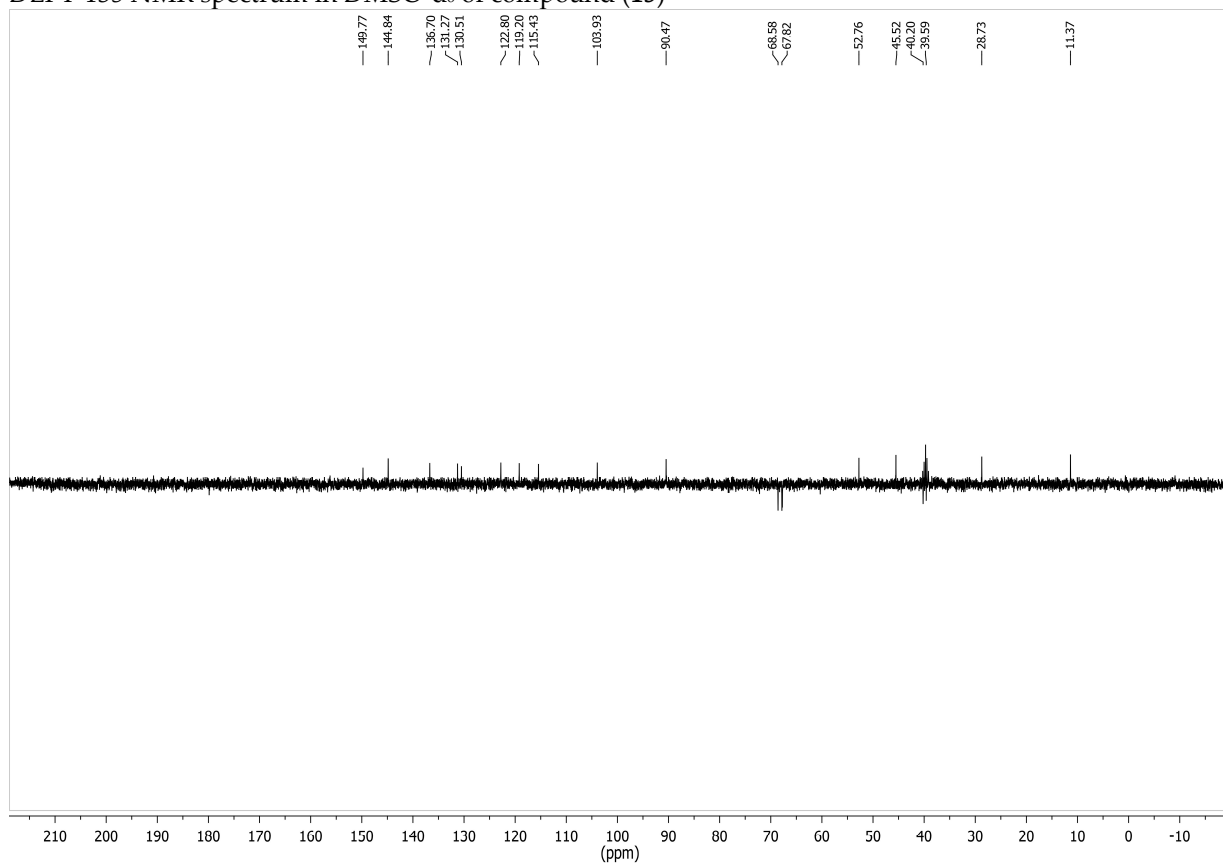

- <sup>13</sup>C NMR NMR spectrum in DMSO-d<sub>6</sub> of compound (15)

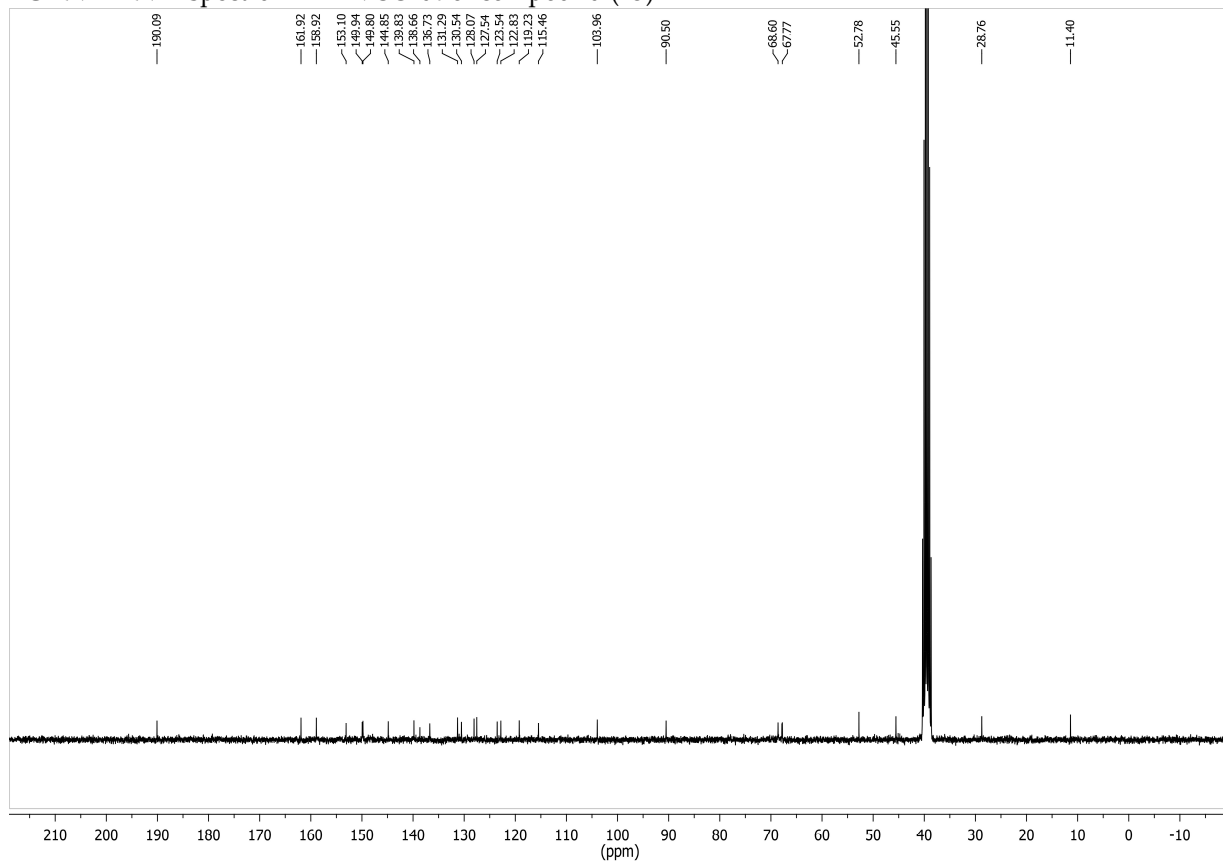

- $^1\text{H}$  NMR spectrum in  $\text{CDCl}_3$  of compound (16)

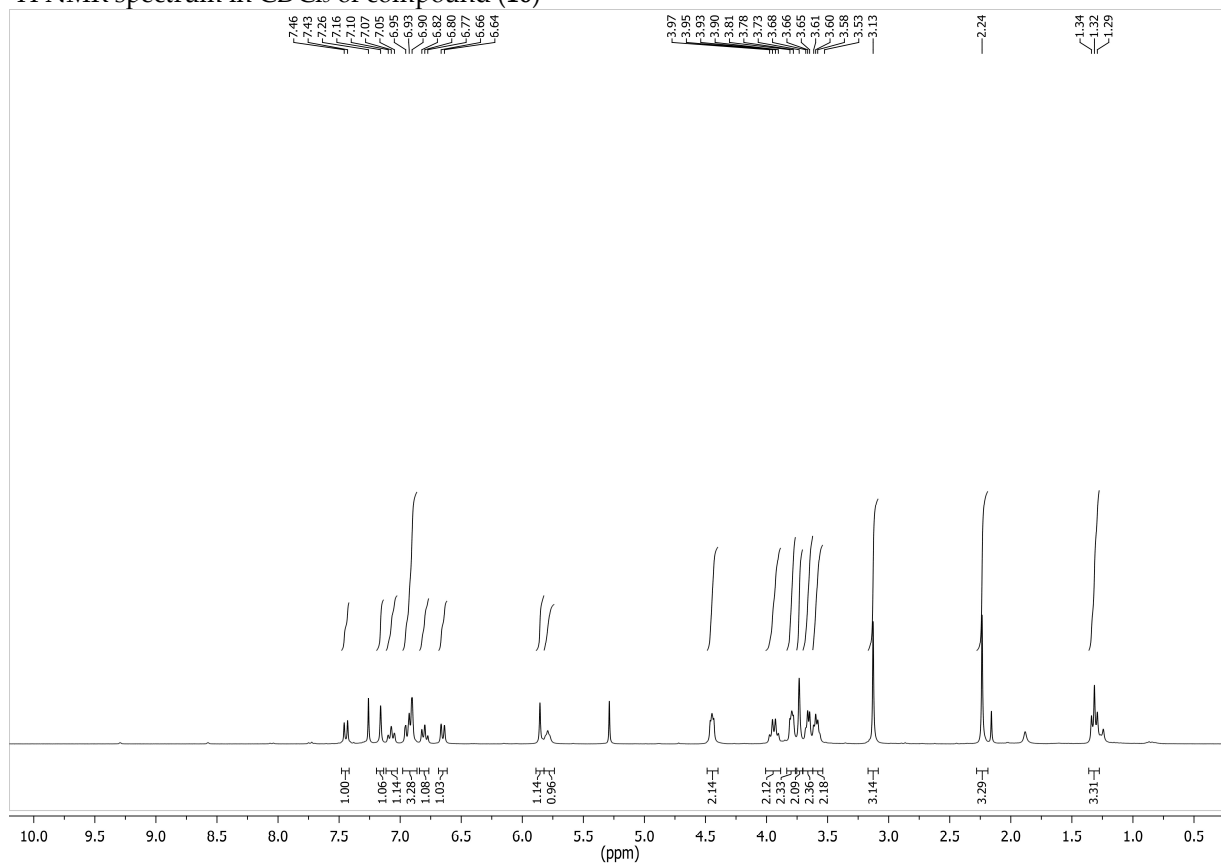

- DEPT-135 NMR spectrum in  $\text{CDCl}_3$  of compound (16)

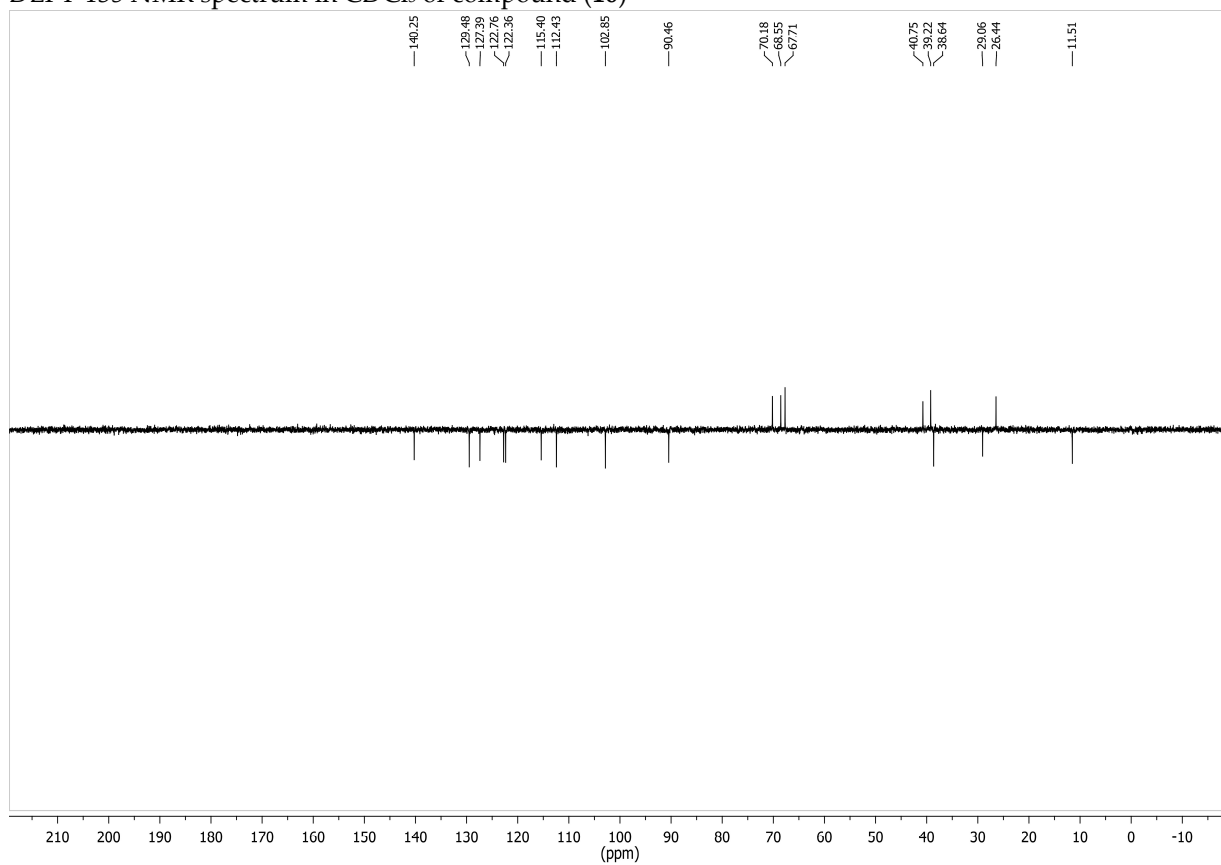

•  $^{13}\text{C}$  NMR NMR spectrum in  $\text{CDCl}_3$  of compound (16)

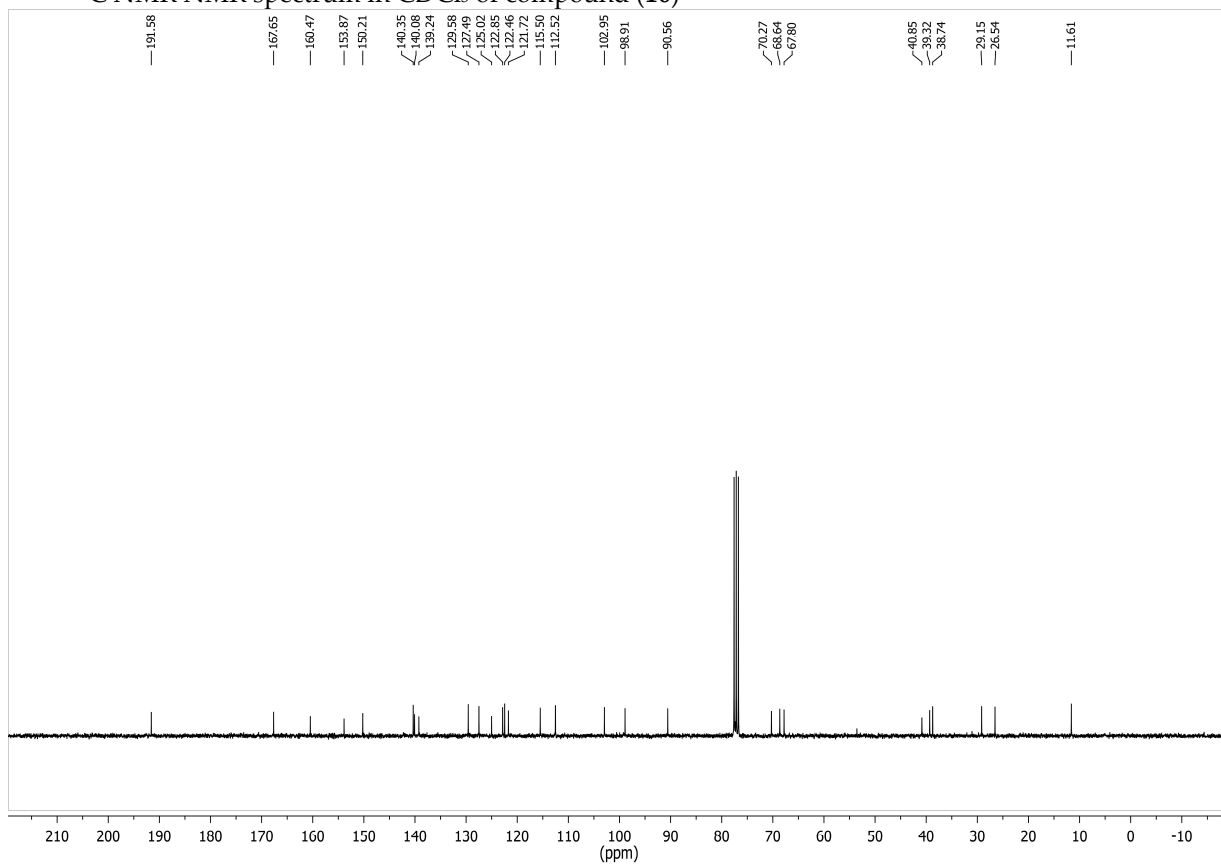

Supplement: molecules-24-01264-s001.pdf [file molecules-24-01264-s001.pdf]
